# Supplementary material
Source: PubMed Central journal article supplement (PMC3447783)
Supplement: supp_blood-2012-05-430389_blood-2012-05-430389-1.pdf [file supp_blood-2012-05-430389_blood-2012-05-430389-1.pdf]

**Supplemental table 1. Antibodies and conditions used for immunohistochemistry**

| <b>Antibody</b> | <b>Manufacturer</b> | <b>Dilution</b> | <b>Incubation Time (minutes)</b> | <b>Antigen Retrieval</b> |
|-----------------|---------------------|-----------------|----------------------------------|--------------------------|
| GCET1           | Gift*               | 1:1             | 30                               | EDTA 10                  |
| CD10            | Ventana             | RTU             | 32                               | CC1                      |
| BCL6            | Dako                | RTU             | 30                               | FLEX                     |
| MUM1            | Dako                | 1:800           | 20                               | FLEX                     |
| FOXP1           | Gift**              | 1:80            | 30                               | EDTA 30                  |
| SPARC           | Santa Cruz          | 1:100           | 30                               | Citrate                  |
| CD31            | Dako                | 1:40            | 30                               | Citrate-1                |

RTU, ready to use; EDTA 10 minutes, 1 mmol/L EDTA, pH 8.0, 10 minutes at 115°C; CC1, cell conditioning solution for antigen unmasking (Ventana); FLEX, Envision Flex high pH visualization system (Dako); EDTA 30 minutes, 1 mmol/L EDTA, pH 8.0, 30 minutes at 95°C; Citrate, 10 mmol/L citrate, pH 6.0, 60 minutes at 95°C; Citrate-1, pH 6.0, 20 minutes

\*Kindly donated by Miguel Piris, Lymphoma Group, Molecular Pathology Program, Spanish National Cancer Center, Madrid, Spain (available from Abcam); \*\*kindly donated by Alison Banham, Nuffield Department of Clinical Laboratory Sciences, University of Oxford, John Radcliffe Hospital, Oxford, United Kingdom (available from Invitrogen)

**Supplemental table 2. Clinical features of all patients and those used or not used to build the training set for the biological prognostic model.**

|                         | <b>Total<br/>(n = 235)</b> |          | <b>Prognostic<br/>Model<br/>(n = 125)</b> |          | <b>Cases not<br/>Used<br/>(n = 110)</b> |          | <b>P</b> |
|-------------------------|----------------------------|----------|-------------------------------------------|----------|-----------------------------------------|----------|----------|
|                         | <b>N</b>                   | <b>%</b> | <b>N</b>                                  | <b>%</b> | <b>N</b>                                | <b>%</b> |          |
| Male                    | 136                        | 58       | 70                                        | 56       | 66                                      | 60       | 0.54     |
| Age                     |                            |          |                                           |          |                                         |          |          |
| < 60 years              | 117                        | 50       | 57                                        | 46       | 60                                      | 55       | 0.17     |
| ≥ 60 years              | 118                        | 50       | 68                                        | 54       | 50                                      | 45       |          |
| Stage                   |                            |          |                                           |          |                                         |          |          |
| I/II                    | 106                        | 48       | 55                                        | 47       | 51                                      | 49       | 0.76     |
| III/IV                  | 115                        | 52       | 62                                        | 53       | 53                                      | 51       |          |
| Missing                 | 14                         | -        | 8                                         | -        | 6                                       | -        |          |
| No. of extranodal sites |                            |          |                                           |          |                                         |          |          |
| < 2                     | 171                        | 84       | 90                                        | 85       | 81                                      | 83       | 0.66     |
| ≥ 2                     | 33                         | 16       | 16                                        | 15       | 17                                      | 17       |          |
| Missing                 | 31                         | -        | 19                                        | -        | 12                                      | -        |          |
| Serum LDH               |                            |          |                                           |          |                                         |          |          |
| Normal                  | 96                         | 51       | 49                                        | 46       | 47                                      | 57       | 0.14     |
| Elevated                | 94                         | 49       | 58                                        | 54       | 36                                      | 43       |          |
| Missing                 | 45                         | -        | 18                                        | -        | 27                                      | -        |          |
| Performance score       |                            |          |                                           |          |                                         |          |          |
| > 70                    | 160                        | 77       | 94                                        | 81       | 66                                      | 72       | 0.11     |
| ≤ 70                    | 48                         | 23       | 22                                        | 19       | 26                                      | 28       |          |
| Missing                 | 27                         | -        | 9                                         | -        | 18                                      | -        |          |
| IPI score               |                            |          |                                           |          |                                         |          |          |
| Low (0-2)               | 125                        | 66       | 69                                        | 66       | 56                                      | 66       | 0.95     |
| High (3-5)              | 64                         | 34       | 35                                        | 34       | 29                                      | 34       |          |
| Missing                 | 46                         | -        | 21                                        | -        | 25                                      | -        |          |
| 5-year OS               |                            | 65       |                                           | 63       |                                         | 70       | 0.40     |
| 5-year EFS              |                            | 59       |                                           | 54       |                                         | 66       | 0.16     |

LDH, lactate dehydrogenase; IPI, International Prognostic Index; OS, overall survival; EFS, event-free survival

**Supplemental table 3. Calibration of the biological prognostic model**

| Time point | Risk group | Overall Survival      |                               | Event-free Survival   |                               |
|------------|------------|-----------------------|-------------------------------|-----------------------|-------------------------------|
|            |            | Predicted probability | Observed probability (95% CI) | Predicted probability | Observed probability (95% CI) |
| 1-year     | 0-1        | 0.93                  | 0.94 (0.82-0.98)              | 0.90                  | 0.81 (0.67-0.90)              |
|            | 2-3        | 0.74                  | 0.84 (0.63-0.94)              | 0.58                  | 0.60 (0.38-0.76)              |
| 2-years    | 0-1        | 0.86                  | 0.86 (0.72-0.93)              | 0.82                  | 0.75 (0.60-0.85)              |
|            | 2-3        | 0.55                  | 0.68 (0.46-0.83)              | 0.46                  | 0.56 (0.34-0.73)              |
| 3-years    | 0-1        | 0.84                  | 0.86 (0.72-0.93)              | 0.70                  | 0.75 (0.60-0.85)              |
|            | 2-3        | 0.53                  | 0.48 (0.28-0.66)              | 0.43                  | 0.39 (0.20-0.57)              |
| 5-years    | 0-1        | 0.73                  | 0.79 (0.65-0.88)              | 0.62                  | 0.72 (0.58-0.83)              |
|            | 2-3        | 0.49                  | 0.44 (0.24-0.62)              | 0.43                  | 0.34 (0.17-0.53)              |

CI, confidence interval
